# Supplementary material for: Aspergillus fumigatus Detection and Risk Factors in Patients with COPD–Bronchiectasis Overlap
Source: PubMed Central journal article supplement (PMC5855745; doi:10.3390/ijms19020523), 2018-02-09
Supplement: ijms-19-00523-s001.pdf [file ijms-19-00523-s001.pdf]

## SUPPLEMENT

Table S1: inter-assay difference in 13 sputum samples.

| Galactomannan 1, ODI | Galactomannan 2, ODI | Difference | CV, % |
|----------------------|----------------------|------------|-------|
| 0.5                  | 0.9                  | 0.4        | 40.4  |
| 0.2                  | 0.2                  | 0          | 0     |
| 5.5                  | 6.3                  | 0.8        | 9.6   |
| 0.3                  | 0.3                  | 0          | 0     |
| 0.7                  | 0.8                  | 0.1        | 9.4   |
| 1.4                  | 1.4                  | 0          | 0     |
| 7.4                  | 6.3                  | -1.1       | 11.4  |
| 6.7                  | 6.1                  | -0.6       | 6.6   |
| 3.5                  | 5.2                  | 1.7        | 27.6  |
| 7.8                  | 6.2                  | -1.6       | 16.2  |
| 2.7                  | 2.5                  | -0.2       | 5.4   |
| 7.5                  | 6.2                  | -1.3       | 13.4  |
| 5.6                  | 5.8                  | 0.2        | 2.5   |

Galactomannan measurement on same samples of 13 subjects. Galactomannan is presented as optical density index ODI: optical density index, CV: coefficient of variation.

Table S2: Aspergillus sputum culture, sputum galactomannan and PCR per patient

|                        | <b><i>A. Fumigatus</i></b><br><b>culture</b> | <b>Sputum</b><br><b>galactomannan, ODI</b> | <b><i>A. Fumigatus</i></b><br><b>PCR, Ct</b> |
|------------------------|----------------------------------------------|--------------------------------------------|----------------------------------------------|
| COPD 1                 | -                                            | 0.5                                        | -                                            |
| COPD 2                 | -                                            | 0.2                                        | -                                            |
| COPD 3                 | positive                                     | 5.5                                        | 29.6                                         |
| COPD 4                 | -                                            | 0.3                                        | -                                            |
| COPD 5                 | -                                            | 0.7                                        | -                                            |
| COPD 6                 | -                                            | 1.4                                        | -                                            |
| COPD 7                 | -                                            | 0.4                                        | -                                            |
| COPD 8                 | -                                            | 0.5                                        | -                                            |
| COPD 9                 | -                                            | 1.5                                        | -                                            |
| COPD 10                | -                                            | 0.8                                        | -                                            |
| COPD 11                | -                                            | 5                                          | -                                            |
| COPD 12                | -                                            | 0.3                                        | -                                            |
| COPD 13                | -                                            | 5.9                                        | -                                            |
| COPD 14                | -                                            | 0.6                                        | -                                            |
| COPD 15                | positive                                     | 6.1                                        | 27.1                                         |
| COPD 16                | -                                            | 0.5                                        | -                                            |
| COPD 17                | -                                            | 0.8                                        | -                                            |
| COPD 18                | -                                            | 0.4                                        | -                                            |
| COPD 19                | -                                            | 1.4                                        | -                                            |
| COPD+bronchiectasis 1  | -                                            | 7.4                                        | -                                            |
| COPD+bronchiectasis 2  | positive                                     | 6.7                                        | 31.1                                         |
| COPD+bronchiectasis 3  | -                                            | 3.6                                        | -                                            |
| COPD+bronchiectasis 4  | positive                                     | 7.8                                        | -                                            |
| COPD+bronchiectasis 5  | -                                            | 2.7                                        | INH                                          |
| COPD+bronchiectasis 6  | positive                                     | 7.5                                        | -                                            |
| COPD+bronchiectasis 7  | -                                            | 5.6                                        | -*                                           |
| COPD+bronchiectasis 8  | -                                            | 0.4                                        | -                                            |
| COPD+bronchiectasis 9  | -                                            | 3.8                                        | -                                            |
| COPD+bronchiectasis 10 | -                                            | 5.8                                        | -                                            |
| COPD+bronchiectasis 11 | -                                            | 5.7                                        | -*                                           |
| COPD+bronchiectasis 12 | -                                            | 0.4                                        | -                                            |
| COPD+bronchiectasis 13 | -                                            | 0                                          | -                                            |
| COPD+bronchiectasis 14 | -                                            | 0.6                                        | -                                            |
| COPD+bronchiectasis 15 | -                                            | 5.7                                        | -                                            |
| COPD+bronchiectasis 16 | positive                                     | 2                                          | -                                            |
| COPD+bronchiectasis 17 | -                                            | 1.2                                        | -                                            |
| negative control 1     | -                                            | 1.6                                        | -                                            |
| negative control 2     | -                                            | 0                                          | -                                            |
| negative control 3     | -                                            | 1.7                                        | -                                            |
| negative control 4     | -                                            | 0                                          | -                                            |
| negative control 5     | -                                            | 5.2                                        | -                                            |
| negative control 6     | -                                            | 0.6                                        | -                                            |
| negative control 7     | -                                            | 0.1                                        | -                                            |

|                     |          |     |      |
|---------------------|----------|-----|------|
| positive control 1  | positive | 6.9 | 35.2 |
| positive control 2  | positive | 5.8 | 27.6 |
| positive control 3  | positive | 4.9 | 33.3 |
| positive control 4  | positive | 5.5 | -    |
| positive control 5  | positive | 5.8 | 29.4 |
| positive control 6  | positive | 6   | -    |
| positive control 7  | positive | 5.9 | 30.8 |
| positive control 8  | positive | 4.4 | -    |
| positive control 9  | positive | 3.7 | -    |
| positive control 10 | positive | 4.7 | 29.3 |
| positive control 11 | positive | 4.6 | 30.7 |
| positive control 12 | positive | 4.7 | -    |

Galactomannan is presented as optical density index. *A. fumigatus* PCR was performed after automated DNA extraction. If PCR was positive, a Ct value is presented. COPD: chronic obstructive pulmonary disease, ODI: optical density index, PCR: polymerase chain reaction, Ct: cycle threshold, INH: inhibition despite of dilution in second run, \*: diluted 1/5 because of inhibition in first run.

Table S3: used reagents for real-time PCR

|                            |                                                          |
|----------------------------|----------------------------------------------------------|
| <b>Target</b>              | 28S rRNA                                                 |
| <b>Primer, forward</b>     | 5'-GCACGTGAAATTGTTGAAAGG-3'                              |
| <b>Primer, reverse</b>     | 5'-CAGGCTGGCCGCATTG-3'                                   |
| <b>Probe</b>               | FAM-5'-CATTTCGTGCCGGTGTACTTCCCCG-3'-TAMRA                |
| <b>Polymerase</b>          | TaqMan Fast Virus Mix (Life technologies, Carlsbad, USA) |
| <b>Temperature program</b> | 95°C – 20 seconds                                        |
